# Supplementary material for: Unraveling sulfur chemistry in interstellar carbon oxide ices
Source: Springer Nature journal article supplement (doi:10.1038/s41467-022-34949-4), 2022-11-22
Supplement: 41467_2022_34949_MOESM1_ESM.pdf [file 41467_2022_34949_MOESM1_ESM.pdf]

## Supplementary information

---

### Unraveling Sulfur Chemistry in Interstellar Carbon Oxide Ices

Xiaolong Li, Bo Lu, Lina Wang, Junfei Xue, Bifeng Zhu, Tarek Trabelsi, Joseph S. Francisco, and  
Xiaoqing Zeng

---

In the format provided by the authors and unedited

#### **Supplementary information file includes:**

---

|                                                                              |   |
|------------------------------------------------------------------------------|---|
| IR spectra obtained in matrixes (Figs. 1–6).....                             | 2 |
| Pathway for the synthesis of <sup>18</sup> O-labeled HOSO• (Fig. 7).....     | 6 |
| Calculated and observed IR spectra of HOCO• and its complexes (Table 1)..... | 7 |
| Calculated and observed IR spectra of HCO• and its complexes (Table 2).....  | 8 |
| Calculated and observed IR spectra of HOS• and its complexes (Table 3).....  | 8 |
| Supplementary References.....                                                | 8 |

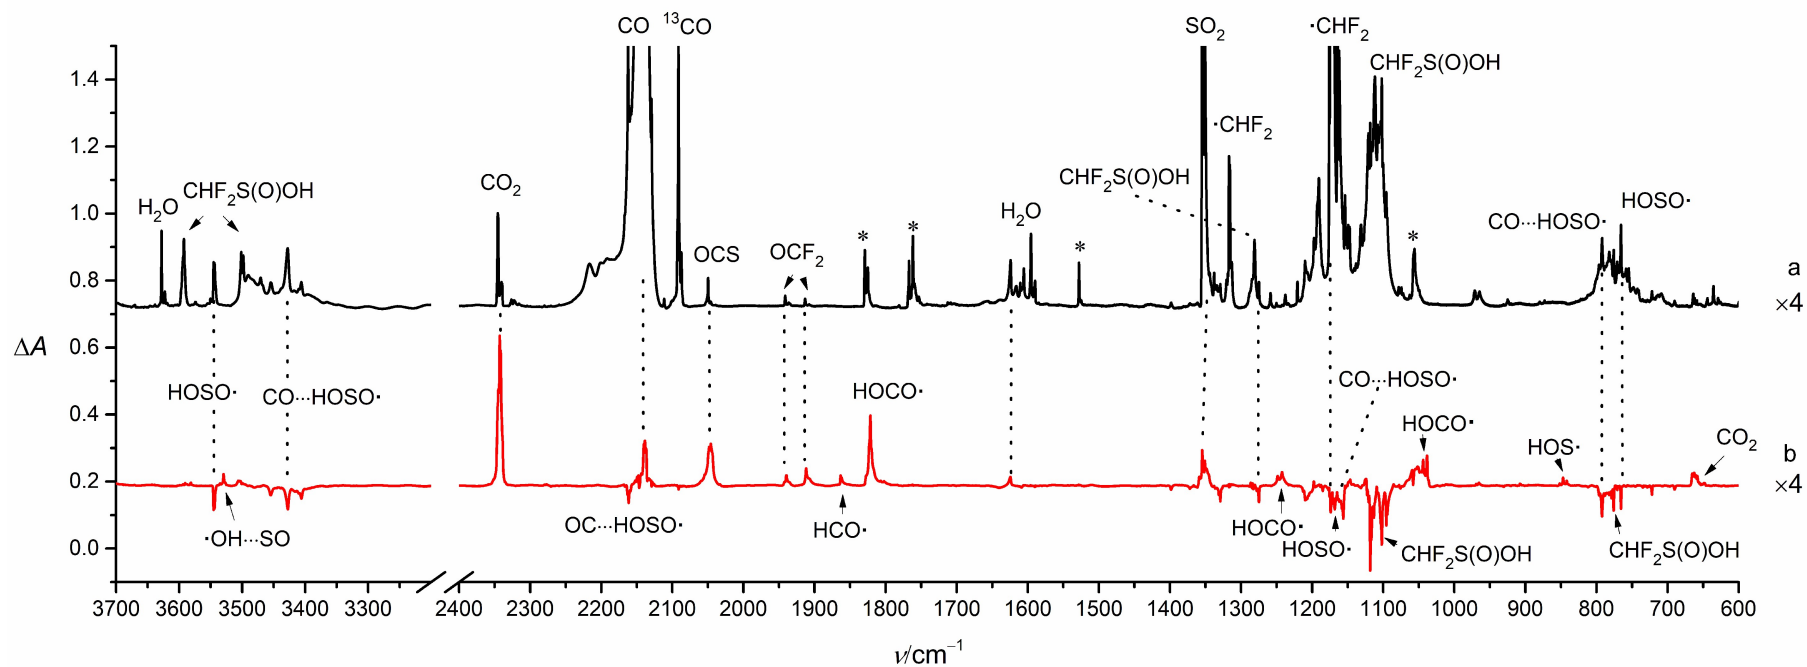

**Supplementary Fig. 1 | The radical complexes and photochemistry of HOSO• in CO-doped Ar-matrix.** **a** Infrared (IR) spectrum ( $3700\text{--}600\text{ cm}^{-1}$ ) for the high-vacuum flash pyrolysis (HVFP, ca.  $700\text{ }^\circ\text{C}$ ) products of  $\text{CHF}_2\text{S(O)OH}$  in CO-doped Ar-matrix (1:50) at 16 K. **b** IR difference spectrum ( $3700\text{--}600\text{ cm}^{-1}$ ) reflecting the changes of the HFVP products of  $\text{CHF}_2\text{S(O)OH}$  in CO-doped Ar-matrix (20 : 1000) at 16 K upon 30 min 266 nm laser irradiation. Unknown species (\*) are marked.

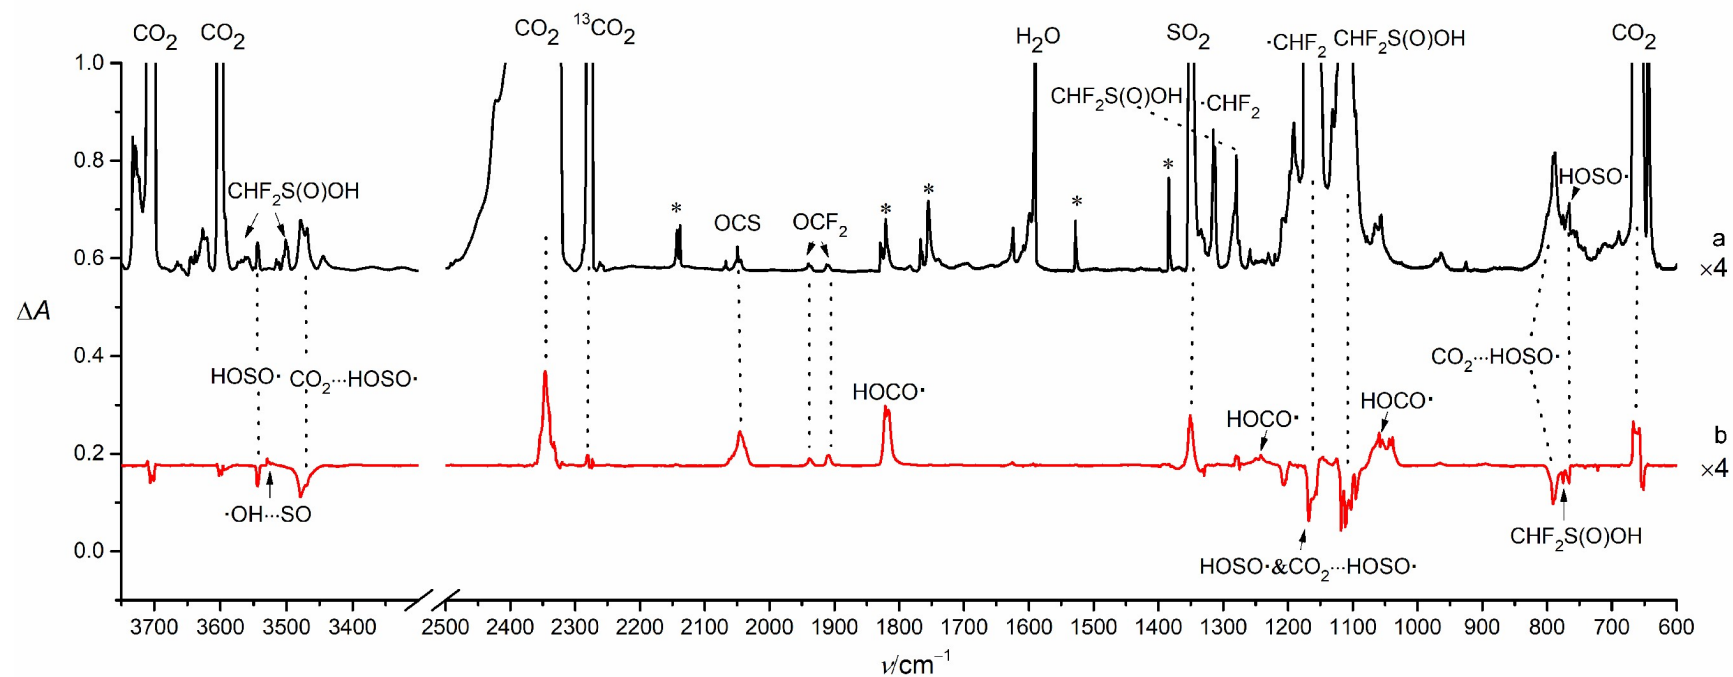

**Supplementary Fig. 2 | The radical complexes and photochemistry of HOSO in  $\text{CO}_2$ -doped Ar-matrix.** **a** Infrared (IR) spectrum (3750–600  $\text{cm}^{-1}$ ) for the HVFP products of  $\text{CHF}_2\text{S(O)OH}$  in  $\text{CO}_2$ -doped Ar-matrix (50:1000) at 16 K. **b** IR difference spectrum (3750–600  $\text{cm}^{-1}$ ) reflecting the changes of the HFVP products of  $\text{CHF}_2\text{S(O)OH}$  in  $\text{CO}_2$ -doped Ar-matrix (20 : 100) at 16 K upon 30 min 266 nm laser irradiation. Unknown species (\*) are also marked.

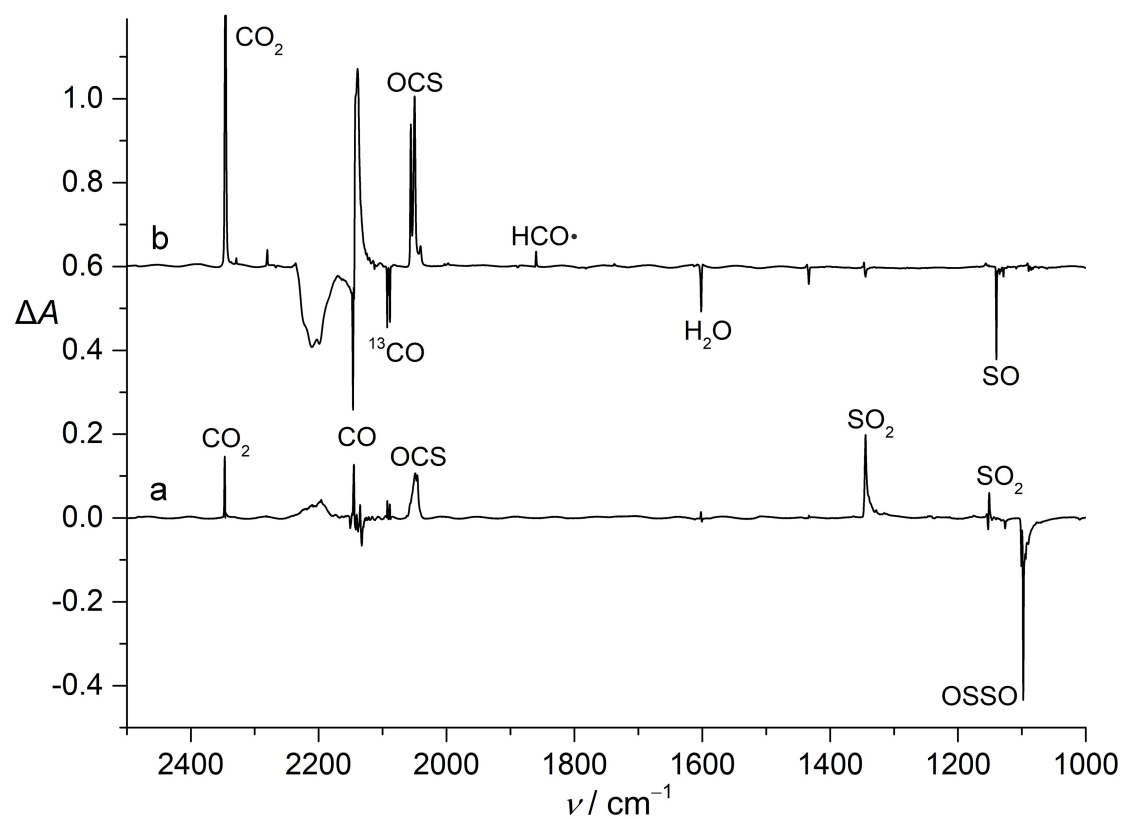

**Supplementary Fig. 3 | Reactions of OSSO and SO in matrixes upon irradiation. a** Infrared (IR) difference spectrum reflecting the change of the CO-matrix isolated OSSO upon irradiation at 365 nm (15 min). **b** IR difference spectrum reflecting the change of the CO-matrix isolated SO upon irradiation at 193 nm (3 min).

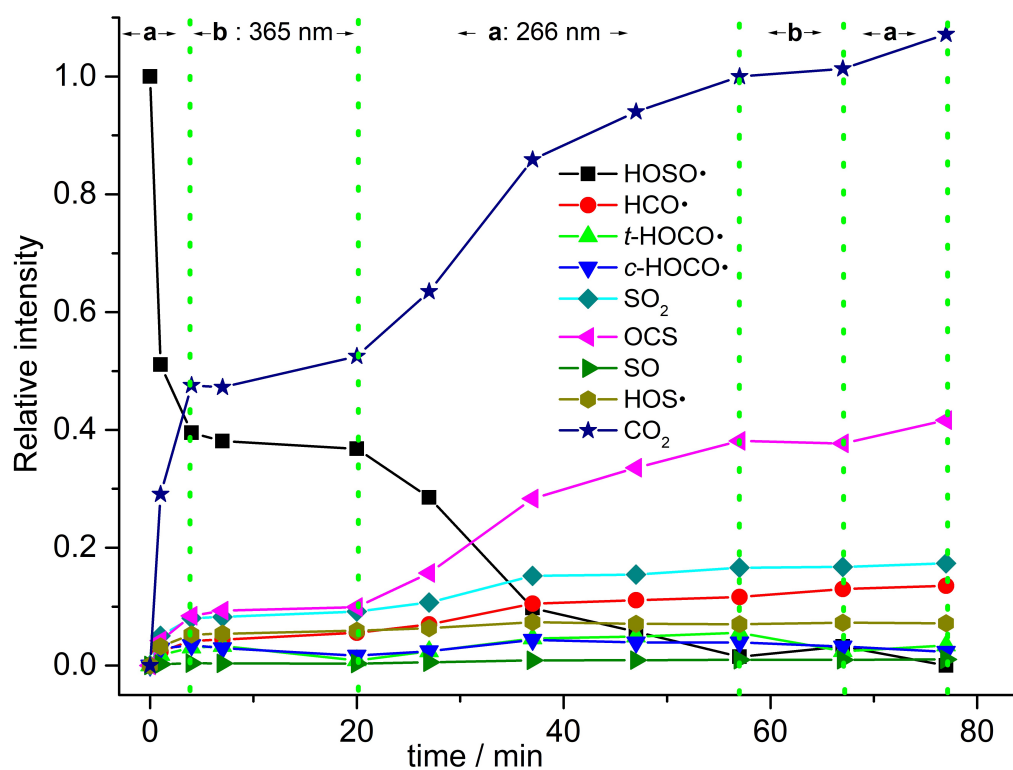

**Supplementary Fig. 4 | The integrated infrared band intensities during the irradiation of HOSO• in CO-matrix.** For clarity, the initial intensity of HOSO• was normalized. Panel **a** corresponds to the irradiation the matrix at 266 nm, and panel **b** corresponds to the irradiation of the matrix at 365 nm.

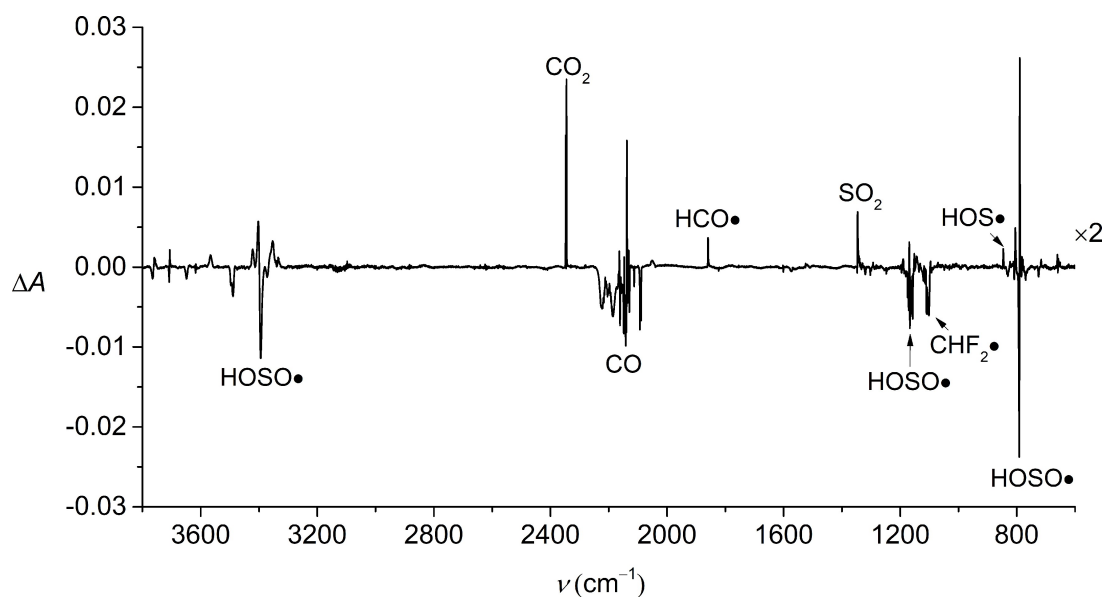

**Supplementary Fig. 5 | The photochemistry of HOSO• in CO-matrix.** Infrared (IR) difference spectrum reflecting the change of the CO-matrix isolated HOSO• upon irradiation at 365 nm (7 min).

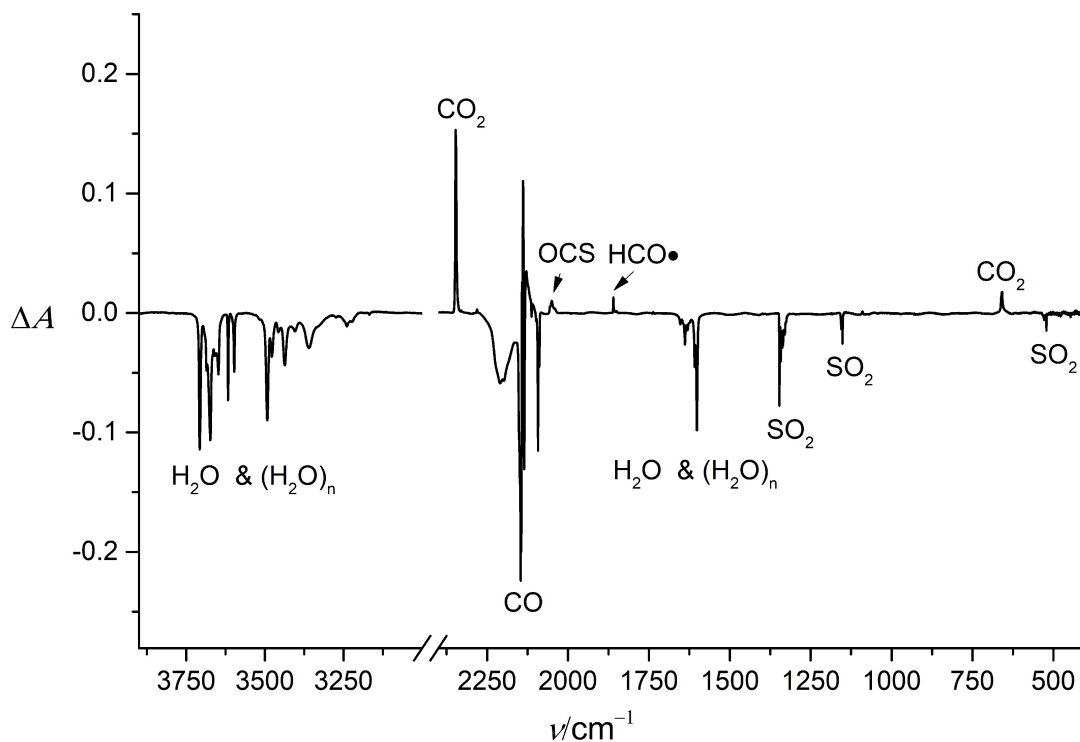

**Supplementary Fig. 6 | The photochemistry of a SO<sub>2</sub>/H<sub>2</sub>O/CO (1 : 10 : 1000) mixture.** Infrared (IR) difference spectrum reflecting the change of the CO-matrix isolated H<sub>2</sub>O and SO<sub>2</sub> upon irradiation at 193 nm (14 min).

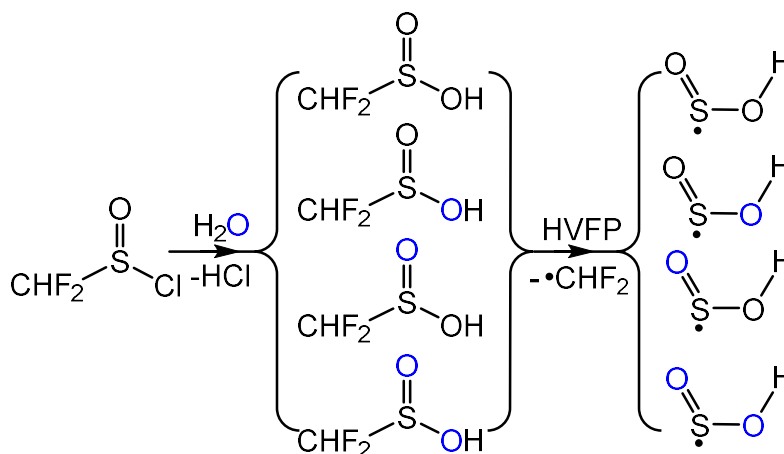

**Supplementary Fig. 7 | Pathway for the synthesis of <sup>18</sup>O-labeled HOSO• by using <sup>18</sup>O-labeled H<sub>2</sub>O (97%) as the starting material.**

**Supplementary Table 1 | Calculated and observed Infrared (IR) spectra of HOCO•/SO/SO<sub>2</sub> and their complexes.**

| Mode                             | <i>t</i> -HOCO•/SO/SO <sub>2</sub> <sup>[a]</sup> |                      |                        | <i>t</i> -HOCO••••SO |                      |                        | <i>t</i> -HOCO••••SO <sub>2</sub> |                      |                        |
|----------------------------------|---------------------------------------------------|----------------------|------------------------|----------------------|----------------------|------------------------|-----------------------------------|----------------------|------------------------|
|                                  | Obs. <sup>[a]</sup>                               | B3LYP <sup>[b]</sup> | CCSD(T) <sup>[c]</sup> | Obs. <sup>[d]</sup>  | B3LYP <sup>[b]</sup> | CCSD(T) <sup>[c]</sup> | Obs. <sup>[e]</sup>               | B3LYP <sup>[b]</sup> | CCSD(T) <sup>[c]</sup> |
| $\nu(\text{O-H})$                | 3456                                              | 3779 (119)           | 3804                   | 3311.0               | 3607 (633)           | 3861                   | 3529.1                            | 3615 (597)           | 3686                   |
| $\nu(\text{C=O})$                | 1833                                              | 1902 (230)           | 1882                   | 1831.7/1795.2        | 1888 (271)           | 1870                   | 1818.9                            | 1890 (274)           | 1871                   |
| $\delta(\text{COH})$             | 1261                                              | 1235 (244)           | 1254                   | 1273.8               | 1306 (190)           | 1319                   | 1278.7                            | 1313 (193)           | 1358                   |
| $\nu_{\text{asym}}(\text{SO}_2)$ | 1355.0                                            | 1376 (215)           | 1365                   | -                    | -                    | -                      | 1350.9                            | 1368 (210)           | 13221                  |
| $\nu_{\text{sym}}(\text{SO}_2)$  | 1152.2                                            | 1179 (32)            | 1156                   | -                    | -                    | -                      | 1146.4                            | 1176 (53)            | 1157                   |
| $\nu(\text{SO})$                 | 1139.5                                            | 1157 (15)            | 1144                   | 1140.0               | 1164 (45)            | 1149                   | -                                 | -                    | -                      |

[a] Observed IR frequencies in CO-matrix.<sup>[1]</sup> [b] Calculated harmonic IR frequencies and intensities ( $\text{km mol}^{-1}$ , in parentheses) at the B3LYP-D3(BJ)/def2-TZVP level of theory. [c] Calculated harmonic IR frequencies at the CCSD(T)/aug-cc-pV(T+d)Z level of theory. [d] Observed IR frequencies in CO-matrix. [e] Observed IR frequencies in CO<sub>2</sub>-doped Ar-matrix.

**Supplementary Table 2 | Calculated and observed Infrared (IR) spectra of HCO•/SO<sub>2</sub> and their complex.**

| Mode                             | HCO•/SO <sub>2</sub> |                      |                        | HCO•⋯SO <sub>2</sub> |                      |                        |
|----------------------------------|----------------------|----------------------|------------------------|----------------------|----------------------|------------------------|
|                                  | Obs. <sup>[a]</sup>  | B3LYP <sup>[b]</sup> | CCSD(T) <sup>[c]</sup> | Obs. <sup>[d]</sup>  | B3LYP <sup>[b]</sup> | CCSD(T) <sup>[c]</sup> |
| $\nu(\text{C-H})$                | 2488                 | 2645 (81)            | 2703                   | 2493.8               | 2727 (18)            | 2750                   |
| $\nu(\text{C=O})$                | 1861                 | 1935 (96)            | 1876                   | 1859.9               | 1922 (87)            | 1868                   |
| $\delta(\text{COH})$             | 1090                 | 1108 (36)            | 1108                   | 1076.5               | 1101 (101)           | 1120                   |
| $\nu_{\text{asym}}(\text{SO}_2)$ | 1355.0               | 1376 (215)           | 1365                   | 1346.8               | 1358 (204)           | 1358                   |
| $\nu_{\text{sym}}(\text{SO}_2)$  | 1152.2               | 1179 (32)            | 1156                   | 1151.9               | 1160 (50)            | 1156                   |

[a] Observed IR frequencies in CO-matrix.<sup>[2]</sup> [b] Calculated harmonic IR frequencies and intensities ( $\text{km mol}^{-1}$ , in parentheses) at the B3LYP-GD3(BJ)/def2-TZVP level of theory. [c] Calculated harmonic IR frequencies at the CCSD(T)/aug-cc-pV(T+d)Z level of theory. [d] Observed IR frequencies in CO-matrix.

**Supplementary Table 3 | Calculated and observed Infrared (IR) spectra of HOS•/CO<sub>2</sub> and their complex.**

| Mode                             | HOS•/CO <sub>2</sub> |                      |                        | CO <sub>2</sub> ⋯HOS• |                      |                        |
|----------------------------------|----------------------|----------------------|------------------------|-----------------------|----------------------|------------------------|
|                                  | Obs. <sup>[a]</sup>  | B3LYP <sup>[b]</sup> | CCSD(T) <sup>[c]</sup> | Obs. <sup>[d]</sup>   | B3LYP <sup>[b]</sup> | CCSD(T) <sup>[c]</sup> |
| $\nu(\text{O-H})$                | 3605.7               | 3722 (91)            | 3765                   | 3451.4                | 3644 (213)           | 3703                   |
| $\delta(\text{SOH})$             | 1156.5               | 1167 (46)            | 1185                   | 1166.2                | 1224 (85)            | 1238                   |
| $\nu(\text{S-O})$                | 837.3                | 845 (68)             | 843                    | 846.2                 | 859 (55)             | 854                    |
| $\nu_{\text{asym}}(\text{CO}_2)$ | 2346.7               | 2411 (650)           | 2372                   | 2345.1                | 2409 (594)           | 2372                   |
| $\delta(\text{CO}_2)$            | 659.3                | 677 (64)             | 664                    | 652.1                 | 671 (27)/648 (85)    | 660/650                |

[a] Observed IR frequencies in *para*-H<sub>2</sub> matrix.<sup>[3]</sup> [b] Calculated harmonic IR frequencies and intensities ( $\text{km mol}^{-1}$ , in parentheses) at the B3LYP-GD3(BJ)/def2-TZVP level of theory. [c] Calculated harmonic IR frequencies at the CCSD(T)/aug-cc-pV(T+d)Z level of theory. [d] Observed IR frequencies in CO-matrix.

### Supplementary References

1. Milligan, D. E. & Jacox, M. E. Infrared spectrum and structure of intermediates in the reaction of OH with CO. *J. Chem. Phys.* **54**, 927–942 (1971).
2. Ewing, G. E., Thompson, W. E. & Pimentel, G. C. Infrared detection of the formyl radical HCO. *J. Chem. Phys.* **32**, 927–932 (1960).
3. Góbi, S., Csonka, I. P., Bazsó, G. & Tarczay, G. Successive hydrogenation of SO and SO<sub>2</sub> in Solid *para*-H<sub>2</sub>: Formation of elusive small oxoacids of sulfur. *ACS Earth Space Chem.* **5**, 1180–1195 (2021).
